# Supplementary material for: Heliaphen, an Outdoor High-Throughput Phenotyping Platform for Genetic Studies and Crop Modeling
Source: Front Plant Sci. 2019 Jan 16;9:1908. doi: 10.3389/fpls.2018.01908 (PMC6343525; doi:10.3389/fpls.2018.01908)
Supplement: Supplementary file 4 [file Data_Sheet_3.CSV]

GO term	Ontology	Description	Number in input list	Number in BG/Ref	p-value	FDR
GO:0006952	P	defense response	59	840	9.2e-08	0.00038
GO:0018130	P	heterocycle biosynthetic process	24	246	2.5e-06	0.005
GO:0019748	P	secondary metabolic process	63	1036	4.3e-06	0.0058
GO:0051186	P	cofactor metabolic process	49	762	1,00E-05	0.01
GO:0006725	P	cellular aromatic compound metabolic process	58	965	1.3e-05	0.011
GO:0006575	P	cellular amino acid derivative metabolic process	43	713	0.00013	0.038
GO:0050896	P	response to stimulus	173	3911	0.00015	0.038
GO:0009814	P	defense response, incompatible interaction	17	183	0.00012	0.038
GO:0009812	P	flavonoid metabolic process	24	316	0.00014	0.038
GO:0009813	P	flavonoid biosynthetic process	21	250	8.9e-05	0.038
GO:0006519	P	cellular amino acid and derivative metabolic process	68	1292	0.00015	0.038
GO:0045036	P	protein targeting to chloroplast	7	35	0.00012	0.038
GO:0006950	P	response to stress	118	2463	6.9e-05	0.038
GO:0019438	P	aromatic compound biosynthetic process	38	606	0.00014	0.038
GO:0006081	P	cellular aldehyde metabolic process	23	282	6.7e-05	0.038
GO:0019682	P	glyceraldehyde-3-phosphate metabolic process	17	181	0.0001	0.038
GO:0019288	P	isopentenyl diphosphate biosynthetic process, mevalonate-independent pathway	16	171	0.00017	0.041
GO:0015995	P	chlorophyll biosynthetic process	12	107	0.0002	0.041
GO:0006732	P	coenzyme metabolic process	33	510	0.00021	0.041
GO:0009240	P	isopentenyl diphosphate biosynthetic process	16	173	0.00019	0.041
GO:0046490	P	isopentenyl diphosphate metabolic process	16	173	0.00019	0.041
GO:0009699	P	phenylpropanoid biosynthetic process	26	367	0.00023	0.044
GO:0009657	P	plastid organization	23	310	0.00027	0.048
GO:0043531	F	ADP binding	31	144	8.8e-17	7.7e-14
GO:0009570	C	chloroplast stroma	33	448	1.8e-05	0.0044
GO:0009532	C	plastid stroma	34	462	1.4e-05	0.0044
GO:0009579	C	thylakoid	50	826	3.9e-05	0.0063
GO:0044435	C	plastid part	67	1316	0.0004	0.043
GO:0044434	C	chloroplast part	66	1298	0.00045	0.043
